# Supplementary material for: Goal Adjustment and Subjective Well-Being in Adulthood
Source: Atypon-hosted journal article supplement (doi:10.1027/1614-0001/a000398), 2023-06-01
Supplement: 1614-0001_a000398_esm1.pdf [file 1614-0001_a000398_esm1.pdf]

**Electronic Supplementary Material 1 for**

**Leipold, B., Loeptien, T., Barbara Loidl, B., & Saalwirth, C. (2023). Goal adjustment and subjective well-being in adulthood: Longitudinal results from a three-wave panel study. *Journal of Individual Differences*. <https://doi.org/10.1027/1614-0001/a000398>**

Table E1: *Descriptive Statistics and Correlations Between Study Variables at T0, T1, and T2*

| Variable    | <i>M (SD)</i> | 2.     | 3.     | 4.     | 5.     | 6.     | 7.     | 8.     | 9.     | 10.     | 11.     | 12.     |
|-------------|---------------|--------|--------|--------|--------|--------|--------|--------|--------|---------|---------|---------|
| 1. WB (T0)  | 4.57 (1.16)   | .81*** | .72*** | .47*** | .47*** | .40*** | .01    | -.03   | -.01   | .12*    | .17**   | .05     |
| 2. WB (T1)  | 4.60 (1.17)   | -      | .81*** | .44*** | .50*** | .46*** | .08    | .00    | -.02   | .08     | .20***  | .06     |
| 3. WB (T2)  | 4.58 (1.21)   |        | -      | .43*** | .47*** | .54*** | .07    | -.01   | .02    | .13*    | .23***  | .13*    |
| 4. AC (T0)  | 5.13 (0.98)   |        |        | -      | .70*** | .64*** | .20*** | .01    | .05    | .26***  | .21***  | .13*    |
| 5. AC (T1)  | 5.13 (0.92)   |        |        |        | -      | .69*** | .17**  | .15**  | .10    | .11     | .19**   | .09     |
| 6. AC (T2)  | 5.09 (0.95)   |        |        |        |        | -      | .13*   | .01    | .21*** | .13*    | .15**   | .15**   |
| 7. GD (T0)  | 3.63 (1.41)   |        |        |        |        |        | -      | .41*** | .38*** | -.45*** | -.25*** | -.29*** |
| 8. GD (T1)  | 3.62 (1.41)   |        |        |        |        |        |        | -      | .45*** | -.27*** | -.48*** | -.31*** |
| 9. GD (T2)  | 3.79 (1.32)   |        |        |        |        |        |        |        | -      | -.29*** | -.37*** | -.49*** |
| 10. GP (T0) | 4.56 (1.30)   |        |        |        |        |        |        |        |        | -       | .53***  | .58***  |
| 11. GP (T1) | 4.52 (1.34)   |        |        |        |        |        |        |        |        |         | -       | .61***  |
| 12. GP (T2) | 4.48 (1.28)   |        |        |        |        |        |        |        |        |         |         | -       |

*Note.*  $N = 305$ .  $M$  = mean,  $SD$  = standard deviation, WB = well-being (mean of affective well-being and life satisfaction), AC = accommodative coping, GD = goal detachment, GP = goal pursuit. \*  $p < .05$ . \*\*  $p < .01$ . \*\*\*  $p < .001$ .

Figure E1: *Latent growth model*

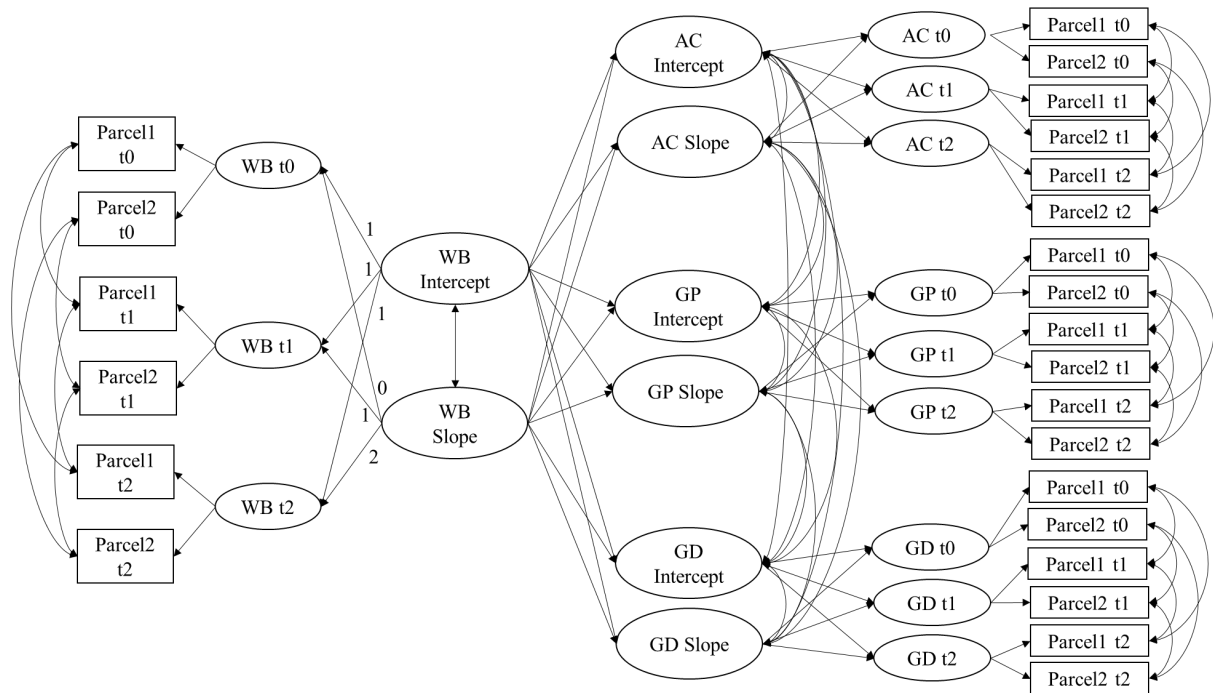

*Note.* Intercepts and slopes of facets of goal adjustment are regressed on the intercept and slope of general well-being.
